# Supplementary material for: Fungi under Modified Atmosphere—The Effects of CO2 Stress on Cell Membranes and Description of New Yeast Stenotrophomyces fumitolerans gen. nov., sp. nov.
Source: MDPI journal article supplement (doi:10.3390/jof9101031), 2023-10-19
Supplement: s1 [file s1]

**Table 1S.** List of the novel species *Stenotrophomyces fumitolerans* WT5, the representatives of the family *Saccharomycetaceae* and outgroup taxa from families *Debaryomycetaceae*, *Phaffomycetaceae*, and *Pichiaceae* used for multi-locus phylogenetic analysis. Type strains were used for the analysis.

| Strains                                      | GenBank accession number for sequences |           |           |          |               |
|----------------------------------------------|----------------------------------------|-----------|-----------|----------|---------------|
|                                              | ITS                                    | 18S       | 26S       | TEF1     | RPB2          |
| <i>Barnettozyma populi</i> CBS 8094          | NR_153632                              | JQ698877  | EF550277  | EF552501 | JQ698938      |
| <i>Candida glabrata</i> CBS 138              | AY046165                               | AY046237  | U44808    | AF402029 | AF527898      |
| <i>Cyberlindnera americana</i> CBS 5644      | NR_152479                              | JQ698878  | EF550328  | EF552552 | JQ698940      |
| <i>Debaryomyces hansenii</i> JCM 1990        | NR_120016                              | JQ698910  | JQ689041  | JQ699068 | JQ698984      |
| <i>Dekkera bruxellensis</i> CBS 72           | NR_165974                              | JQ698898  | JQ689028  | JQ699055 | JQ698969      |
| <i>Eremothecium cymbalariae</i> NRRL Y-17582 | AY046219                               | JQ698891  | JQ689024  | AF402090 | JQ698962      |
| <i>Eremothecium gossypii</i> NRRL Y-1056     | AY046216                               | AY046265  | U43389    | AF402087 | AY497595      |
| <i>Kazachstania africana</i> CBS 2517        | AY046155                               | AY046229  | AY048159  | AF402019 | AF527887      |
| <i>Kazachstania exigua</i> NRRL Y-12640      | AY046170                               | X98868    | AY048163  | AF402034 | AF527902      |
| <i>Kazachstania humilis</i> CBS 5658         | AY046174                               | AY046243  | U69878    | AF402039 | AF527906      |
| <i>Kazachstania lodderae</i> CBS 2757        | AY046160                               | X83824    | AY048161  | AF402024 | AF527893      |
| <i>Kazachstania martiniae</i> CBS 6334       | AY046157                               | AY046231  | AF398481  | AF402021 | AF527890      |
| <i>Kazachstania piceae</i> CBS 7738          | AY046159                               | AY046233  | U84346    | AF402023 | AF527892      |
| <i>Kazachstania servazzii</i> CBS 4311       | AY046153                               | Z75581    | AY048157  | AF402017 | AF527885      |
| <i>Kazachstania telluris</i> CBS 2685        | AY046164                               | AY046236  | U72158    | AF402028 | AF527897      |
| <i>Kazachstania viticola</i> CBS 6463        | AY046162                               | JQ698889  | JQ689020  | AF402026 | AF527895      |
| <i>Kluyveromyces lactis</i> NRRL Y-8278      | AY046213                               | AY046264  | U94919    | AF402084 | AY497620      |
| <i>Kluyveromyces marxianus</i> NRRL Y-8281   | AY046214                               | X89523    | JQ689023  | AF402085 | JQ698961      |
| <i>Kregervanrija fluxuum</i> CBS 2287        | NR_111196                              | JQ698897  | EF550268  | JQ699054 | JQ698968      |
| <i>Lachancea kluyveri</i> CBS 3082           | AY046209                               | Z75580    | U68552    | AF402079 | AY497609      |
| <i>Lachancea thermotolerans</i> CBS 6340     | AY046207                               | X89526    | JQ689022  | AF402077 | JQ698960      |
| <i>Lodderomyces elongisporus</i> CBS 2605    | NR_111593                              | JQ698906  | JQ689035  | JQ699062 | JQ698978      |
| <i>Meyerozyma guilliermondii</i> CBS 2030    | NR_111247                              | JQ698913  | JQ689047  | JQ699074 | JQ698990      |
| <i>Millerozyma farinosa</i> CBS 185          | NR_111254                              | AB054281  | JQ689046  | JQ699073 | JQ698989      |
| <i>Nakaseomyces delphensis</i> CBS 2170      | AY046166                               | X83823    | JQ689014  | AF402030 | AF527899      |
| <i>Naumovozya castellii</i> CBS 4309         | AY046180                               | Z75577    | AY048167  | AF402045 | AY548498      |
| <i>Naumovozya dairenensis</i> CBS 421        | AY046181                               | Z75579    | JQ689019  | AF402046 | AF527908      |
| <i>Pichia membranifaciens</i> CBS 107        | NR_111195                              | JQ698896  | EF550227  | JQ699053 | JQ698967      |
| <i>Saccharomyces cerevisiae</i> NRRL Y-12632 | AY046146                               | EU011664  | JQ689017  | AF402004 | AF527884      |
| <i>Saccharomyces kudriavzevii</i> CBS 8840   | AY046150                               | AY046226  | AF398480  | AF402011 | KC881091      |
| <i>Saccharomycodes ludwigii</i> NRRL Y-12793 | AY046204                               | JQ698892  | U73601    | AF402074 | JQ698963      |
| <i>Saturnispora dispersa</i> CBS 794         | NR_155832                              | JQ698895  | JQ689027  | JQ699052 | JQ698966      |
| <i>Schizosaccharomyces pombe</i> ATCC 38366  | NR121563.1                             | AY046272  | JQ689077  | AF402093 | NM_001018498  |
| <i>Starmera amethionina</i> CBS 6940         | CBS data                               | JQ698876  | JQ689006  | EF552506 | JQ698937      |
| <i>Stenotrophomyces fumitolerans</i> WT5     | OQ708375                               | OQ708375  | OQ708375  | pending  | OQ715316      |
| <i>Tetrapisispora arboricola</i> CBS 8765    | NR_155927                              | NG_064806 | NG_058411 | AF402043 | GCA_030557565 |
| <i>Tetrapisispora blattae</i> CBS 6284       | NR_155928                              | NG_063244 | KY109818  | AF402040 | GCF_000315915 |
| <i>Tetrapisispora phaffii</i> CBS 4417       | AY046176                               | JQ698887  | JQ689013  | AF402041 | JQ698951      |
| <i>Torulaspora delbrueckii</i> NRRL Y-866    | AY046187                               | X98120    | JQ689018  | AF402052 | JQ698956      |
| <i>Vanderwaltozyma polyspora</i> CBS 2163    | AY046182                               | JQ698890  | JQ689021  | AF402047 | AF527909      |
| <i>Wickerhamomyces anomalus</i> NRRL Y-366   | AY046221                               | EF550479  | U74592    | AF402092 | EF599479      |
| <i>Wickerhamomyces canadensis</i> CBS 1992   | KY105899                               | EF550438  | JQ689007  | EF552524 | JQ698939      |
| <i>Yueomyces sinensis</i> CBS 7075           | NR_159012                              | KP866235  | NG_055015 | KP866224 | KP866228      |

|                                                 |          |          |          |          |          |
|-------------------------------------------------|----------|----------|----------|----------|----------|
| <i>Zygosaccharomyces bailii</i> CBS 680         | AY046191 | X91083   | U72161   | AF402060 | KC678068 |
| <i>Zygotorulaspora dagestanica</i> KBP:Y-4591   | MW036827 | MW036827 | MW036827 | LR884242 | LR884244 |
| <i>Zygotorulaspora florentina</i> CBS 746       | AY046168 | X91086   | U72165   | AF402032 | AF527900 |
| <i>Zygosaccharomyces kombuchaensis</i> CBS 8849 | AY046193 | AF339890 | AF339904 | AF402062 | KT728704 |
| <i>Zygotorulaspora mrakii</i> CBS 4218          | AY046169 | JQ698888 | JQ689015 | AF402033 | AF527901 |
| <i>Zygosaccharomyces rouxii</i> CBS 732         | AY046189 | AY046251 | JQ689016 | AF402054 | JQ698954 |

---
